# Supplementary material for: Aqueous reactions of organic triplet excited states with atmospheric alkenes
Source: Copernicus journal article supplement (doi:10.5194/acp-19-5021-2019), 2019-04-12
Supplement: Supplementary file 1 [file acp-19-5021-2019-supplement.pdf]

Supplement of Atmos. Chem. Phys., 19, 5021–5032, 2019  
<https://doi.org/10.5194/acp-19-5021-2019-supplement>  
© Author(s) 2019. This work is distributed under  
the Creative Commons Attribution 4.0 License.

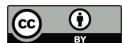

*Supplement of*

## **Aqueous reactions of organic triplet excited states with atmospheric alkenes**

**Richie Kaur et al.**

*Correspondence to:* Cort Anastasio ([canastasio@ucdavis.edu](mailto:canastasio@ucdavis.edu))

The copyright of individual parts of the supplement might differ from the CC BY 4.0 License.

17 **Table S1.** Reference probes and triplicate measurements of rate constants for alkenes in a solution at pH  
 18 5.5. Errors (in parentheses) for each replicate measurement represent  $\pm 1$  standard error, determined by  
 19 propagating errors in the slope of the relative rate plot and in the reference compound rate constant. Errors  
 20 on the average values represent  $\pm 1 \sigma$  determined from the average of the replicate values.

| #  | Alkene Name (ALK)          | Abbreviation | Reference Probe  | $k_{\text{ALK}+3\text{BP}^*} (10^8 \text{ M}^{-1} \text{ s}^{-1})$ |             |             |                     |
|----|----------------------------|--------------|------------------|--------------------------------------------------------------------|-------------|-------------|---------------------|
|    |                            |              |                  | Replicate 1                                                        | Replicate 2 | Replicate 3 | Average (SD)        |
| 1  | 5-Hexen-1-ol               | 5HxO         | 3MBO             | 3.1 (0.4)                                                          | 1.9 (0.3)   | 2.2 (0.3)   | 2.4 (0.6)           |
| 2  | Allyl alcohol              | AIO          | BDO              | 2.8 (0.3)                                                          | 2.5 (0.2)   | 2.8 (0.3)   | 2.7 (0.2)           |
| 3  | 3-Hexene-1,6-diol          | HDO          | 3MBO             | 2.5 (0.4)                                                          | 3.7 (0.5)   | 3.2 (0.4)   | 3.1 (0.7)           |
| 4  | 2,3-Butadien-1-ol          | BDO          | 3MBO             | 3.3 (0.5)                                                          | 3.8 (0.5)   | 3.6 (0.5)   | 3.6 (0.3)           |
| 5  | 3-Buten-1-ol               | 3B1O         | cHxO             | 4.2 (0.4)                                                          | 3.2 (0.3)   | 3.6 (0.4)   | 3.7 (0.5)           |
| 6  | 1-Penten-3-ol              | PE3O         | 3B2O             | 3.9 (1.1)                                                          | 4.2 (1.2)   | 4.7 (1.3)   | 4.3 (0.4)           |
| 7  | 3-Buten-2-ol               | 3B2O         | cHxO             | 5.7 (0.5)                                                          | 5.6 (0.5)   | 3.3 (0.5)   | 4.9 (1.3)           |
| 8  | 2-Buten-1-ol               | 2B1O         | 4M3PO            | 5.6 (0.2)                                                          | 4.1 (0.3)   | 5.9 (0.5)   | 5.2 (1.0)           |
| 9  | 5-Hexenyl acetate          | 5HxAc        | 3MBO             | 4.7 (0.7)                                                          | 5.0 (0.7)   | 7.9 (1.1)   | 5.9 (1.8)           |
| 10 | trans-3-hexen-1-ol         | tHxO         | 3MBO             | 13 (2)                                                             | 14 (2)      | 14 (2)      | 14 (1)              |
| 11 | 1-Chloro-3-methyl-2-butene | CMB          | BDO <sup>a</sup> | 17 (1)                                                             | -           | -           | 17 (1) <sup>b</sup> |
| 12 | 3-Methyl-2-buten-1-ol      | 3MBO         | cHxO             | 21 (2)                                                             | 20 (2)      | 16 (1)      | 19 (3)              |
| 13 | 2-Methyl-2-penten-1-ol     | 2M2PO        | 3MBO             | 29 (4)                                                             | 28 (4)      | 28 (4)      | 28 (1)              |
| 14 | 4-Methyl-3-penten-1-ol     | 4M3PO        | 3MBO             | 42 (6)                                                             | 39 (5)      | 40 (5)      | 40 (2)              |
| 15 | cis-3-hexen-1-ol           | cHxO         | PhOH             | 62 (11) <sup>c</sup>                                               | 70 (13)     | 59 (11)     | 64 (6)              |
| 16 | cis-3-hexenyl acetate      | cHxAc        | cHxO             | 66 (7)                                                             | 71 (6)      | 59 (5)      | 65 (6)              |
| 17 | Methyl jasmonate           | MeJA         | cHxO             | 80 (7)                                                             | 69 (6)      | 75 (7)      | 75 (5)              |

21 <sup>a</sup> Measurement of the rate constant for CMB was done in a solution containing a minimal amount of acetonitrile to  
 22 dissolve the compound.

23 <sup>b</sup> Error represents  $\pm 1$  SE, based on the SE of the relative rate slope and reference rate constant  $k_{\text{BDO}+3\text{BP}^*}$  given in the  
 24 table.

25 <sup>c</sup> Phenol (PhOH) was used as the reference probe using the reference rate constant of  $3.9 (\pm 0.7) \times 10^9 \text{ M}^{-1} \text{ s}^{-1}$ ,  
 26 measured in this study, using 2,4,6-trimethylphenol (TMP) as a reference compound ( $k_{\text{TMP}+3\text{BP}^*} = 5.1 (\pm 0.9) \times 10^9$   
 27  $\text{M}^{-1} \text{ s}^{-1}$ ; Canonica et al. (2000)).

28

29 **Table S2.** Highest- and singly-occupied molecular orbitals (HOMOs, SOMOs) of representative alkenes  
 30 showing removing of an electron from the  $\pi$  system.<sup>†</sup>

| ALK Abbreviation (#) | HOMO | SOMO | HOMO+1 (eV) | SOMO+1 (eV) |
|----------------------|------|------|-------------|-------------|
| HDO (3)              |      |      | <br>0.39    | <br>0.45    |
| BDO (4)              |      |      | <br>0.41    | <br>0.45    |
| PE3O (6)             |      |      | <br>0.41    | <br>0.49    |
| 3B2O (7)             |      |      | <br>0.40    | <br>0.49    |
| 3MBO (12)            |      |      | <br>0.38    | <br>0.48    |
| cHxO (15)            |      |      | <br>0.39    | <br>0.46    |

31  
 32 <sup>†</sup> HOMOs and SOMOs were computed from single point calculations at MP2/CBSB3 (Frisch et al.,  
 33 2016). HOMO+1 and SOMO+1 values in eV are shown relative to HOMO and SOMO, respectively.

34

**Table S3.** HOMOs and SOMOs of alkenes showing removing of an electron from the oxygen.<sup>†</sup>

| ALK Abbreviation (#) | HOMO | SOMO | HOMO+1 (eV) | SOMO+1 (eV) |
|----------------------|------|------|-------------|-------------|
| 3B1O (5)             |      |      | <br>0.40    | <br>0.45    |
| HxAc (16)            |      |      | <br>0.39    | <br>0.44    |
| MeJA (17)            |      |      | <br>0.37    | <br>0.19    |

35

<sup>†</sup>HOMOs and SOMOs were computed from single point calculations at MP2/CBSB3 (B3LYP/CBSB7 was used for ALKs 16 and 17). HOMO+1 and SOMO+1 values in eV are shown relative to HOMO and SOMO, respectively.

36 **Table S4.** Oxidation potentials (in units of V) of various isomers of isoprene- and limonene-derived  
 37 OVOCs, calculated using the CBS-QB3 compound method. The lowest energy isomer for each OVOC  
 38 is highlighted using a blue box. Compounds not shown here (18, 20 and 22) have no relevant isomers.

| <b>δ4 ISOPOOH<br/>(19)</b> | <b>δISONO2<br/>(21)</b> | <b>LMNALD<br/>(23)</b> | <b>2,5OH-LMNALD<br/>(24)</b> |          | <b>4,7OH-LMNALD<br/>(25)</b> |
|----------------------------|-------------------------|------------------------|------------------------------|----------|------------------------------|
| <br>2.25                   | <br>2.40                | <br>2.22               | <br>2.06                     | <br>2.24 | <br>2.17                     |
| <br>2.28                   | <br>2.45                | <br>2.28               | <br>2.12                     | <br>2.26 | <br>2.17                     |
|                            |                         |                        | <br>2.23                     | <br>2.39 | <br>2.21                     |
|                            |                         |                        | <br>2.24                     | <br>2.39 | <br>2.41                     |
|                            |                         |                        |                              |          | <br>2.48                     |

39

40 **Table S5.** Measured or estimated rate constants for reactions of OVOCs with oxidants, photolysis, and hydrolysis.

| OVOC |                              | Gas-phase rate constants ( $\text{cm}^3 \text{mole}^{-1} \text{s}^{-1}$ ) |                                      |                              |                                         |                                          |                      |
|------|------------------------------|---------------------------------------------------------------------------|--------------------------------------|------------------------------|-----------------------------------------|------------------------------------------|----------------------|
|      |                              | $k_{\text{OVOC}+\text{OH}}$                                               | Reference                            | $k_{\text{OVOC}+\text{O}_3}$ | Reference                               | $J^{\text{Photolysis}} (\text{s}^{-1})$  | Reference            |
| #    | Name                         |                                                                           |                                      |                              |                                         |                                          |                      |
| 18   | $\beta$ 4-ISOPOOH            | 1.2E-10                                                                   | St. Clair et al. (2015)              | 1.3E-17                      | Khamaganov and Hites (2001)             |                                          |                      |
| 19   | $\delta$ 4-ISOPOOH           | 1.2E-10                                                                   | St. Clair et al. (2015)              | 1.3E-17                      | Khamaganov and Hites (2001)             |                                          |                      |
| 20   | $\beta$ -ISONO <sub>2</sub>  | 5.4E-11                                                                   | Lee et al. (2014)                    | 5.0E-19                      | Lee et al. (2014)                       |                                          |                      |
| 21   | $\delta$ -ISONO <sub>2</sub> | 1.1E-10                                                                   | Lee et al. (2014)                    | 2.8E-17                      | Lee et al. (2014)                       |                                          |                      |
| 22   | HPALD <sub>2</sub>           | 5.1E-11                                                                   | Wolfe et al. (2012)                  | 1.2E-18                      | Wolfe et al. (2012)                     | 6.3E-05                                  | Wolfe et al. (2012)  |
| 23   | LMNALD                       | 1.6E-10                                                                   | Gill and Hites (2002)                | 2.1E-16                      | Khamaganov and Hites (2001)             |                                          |                      |
| 24   | 2,5OH-LMNALD                 | 1.6E-10                                                                   | Gill and Hites (2002)                | 2.1E-16                      | Khamaganov and Hites (2001)             |                                          |                      |
| 25   | 4,7OH-LMNALD                 | 1.6E-10                                                                   | Gill and Hites (2002)                | 2.1E-16                      | Khamaganov and Hites (2001)             |                                          |                      |
| 26   | HPALD <sub>1</sub>           | 5.1E-11                                                                   | Wolfe et al. (2012)                  | 1.2E-18                      | Wolfe et al. (2012)                     | 6.3E-05                                  | Wolfe et al. (2012)  |
| OVOC |                              | Aqueous-phase rate constants ( $\text{L mol}^{-1} \text{s}^{-1}$ )        |                                      |                              |                                         |                                          |                      |
|      |                              | $k_{\text{OVOC}+\text{OH}}$                                               | Reference                            | $k_{\text{OVOC}+\text{O}_3}$ | Reference                               | $k'_{\text{Hydrolysis}} (\text{s}^{-1})$ | Reference            |
| #    | Name                         |                                                                           |                                      |                              |                                         |                                          |                      |
| 18   | $\beta$ 4-ISOPOOH            | 2.5E+09                                                                   | Rivera-Rios et al. (2018)            | 4.7E+04                      | Schöne and Herrmann (2014) <sup>a</sup> |                                          |                      |
| 19   | $\delta$ 4-ISOPOOH           | 2.5E+09                                                                   | Rivera-Rios et al. (2018)            | 4.7E+04                      | Schöne and Herrmann (2014) <sup>a</sup> |                                          |                      |
| 20   | $\beta$ -ISONO <sub>2</sub>  | 5.0E+09                                                                   | Herrmann et al. (2015) <sup>b</sup>  | 4.7E+04                      | Schöne and Herrmann (2014) <sup>a</sup> | 1.6E-05                                  | Jacobs et al. (2014) |
| 21   | $\delta$ -ISONO <sub>2</sub> | 5.0E+09                                                                   | Herrmann et al. (2015) <sup>b</sup>  | 4.7E+04                      | Schöne and Herrmann (2014) <sup>a</sup> | 6.8E-03                                  | Jacobs et al. (2014) |
| 22   | HPALD <sub>2</sub>           | 9.0E+09                                                                   | Schöne et al. (2014) <sup>c</sup>    | 2.3E+04                      | Schöne and Herrmann (2014) <sup>c</sup> |                                          |                      |
| 23   | LMNALD                       | 1.0E+10                                                                   | Witkowski et al. (2018) <sup>d</sup> | 4.0E+04                      | Witkowski et al. (2018) <sup>d</sup>    |                                          |                      |
| 24   | 2,5OH-LMNALD                 | 1.0E+10                                                                   | Witkowski et al. (2018)              | 4.0E+04                      | Witkowski et al. (2018) <sup>d</sup>    |                                          |                      |
| 25   | 4,7OH-LMNALD                 | 1.0E+10                                                                   | Witkowski et al. (2018) <sup>d</sup> | 4.0E+04                      | Witkowski et al. (2018) <sup>d</sup>    |                                          |                      |
| 26   | HPALD <sub>1</sub>           | 9.0E+09                                                                   | Schöne et al. (2014) <sup>c</sup>    | 2.3E+04                      | Schöne and Herrmann (2014) <sup>c</sup> |                                          |                      |

41 <sup>a</sup> Average of rate constants for methacrolein and methyl vinyl ketone used as a proxy.

42 <sup>b</sup> Estimate based on the rate constants for similar unsaturated compounds with  $\cdot\text{OH}$  in the indicated reference.

43 <sup>c</sup> Rate constant for methacrolein used as a proxy.

44 <sup>d</sup> Rate constants for neutral dicarbonyl derivatives of limonic and limonic acids, used as proxies.

45 **Table S6.** Loss rate constants for OVOCs due to different pathways.

| #  | OVOC Name    | $K_H^a$<br>(M atm <sup>-1</sup> ) | $\chi_{aq}^b$ | Pseudo-first-order rate constant for loss due to oxidants in the gas-phase (s <sup>-1</sup> ) |                |            | Pseudo-first-order rate constant for loss due to oxidants in the aqueous-phase (s <sup>-1</sup> ) |                 |                                                |                                                  |              |
|----|--------------|-----------------------------------|---------------|-----------------------------------------------------------------------------------------------|----------------|------------|---------------------------------------------------------------------------------------------------|-----------------|------------------------------------------------|--------------------------------------------------|--------------|
|    |              |                                   |               | $k'_{OH,g}^c$                                                                                 | $k'_{O_3,g}^d$ | $J_{hv}^e$ | $k'_{OH,aq}^f$                                                                                    | $k'_{O_3,aq}^g$ | $k'_{3BP^*,aq}^h$<br>(High Triplet Reactivity) | $k'_{3C^*,aq}^i$<br>(Typical Triplet Reactivity) | $k'_{Hyd}^j$ |
| 18 | β4-ISOPOOH   | 1.5E+06                           | 0.97          | 1.2E-04                                                                                       | 9.6E-06        |            | 5.0E-06                                                                                           | 1.6E-05         | 4.0E-06                                        | 1.4E-07                                          |              |
| 19 | δ4-ISOPOOH   | 1.2E+06                           | 0.97          | 1.2E-04                                                                                       | 9.6E-06        |            | 5.0E-06                                                                                           | 1.6E-05         | 6.8E-05                                        | 2.4E-06                                          |              |
| 20 | β-ISONO2     | 5.1E+04                           | 0.55          | 5.4E-05                                                                                       | 3.7E-07        |            | 1.0E-05                                                                                           | 1.6E-05         | 2.1E-05                                        | 7.3E-07                                          | 1.6E-05      |
| 21 | δ-ISONO2     | 4.3E+04                           | 0.51          | 1.1E-04                                                                                       | 2.1E-05        |            | 1.0E-05                                                                                           | 1.6E-05         | 4.6E-05                                        | 1.6E-06                                          | 6.8E-03      |
| 22 | HPALD2       | 1.2E+05                           | 0.75          | 5.1E-05                                                                                       | 8.9E-07        | 6.3E-05    | 1.8E-05                                                                                           | 7.6E-06         | 2.0E-05                                        | 7.0E-07                                          |              |
| 23 | LMNALD       | 4.5E+03                           | 0.10          | 1.6E-04                                                                                       | 1.6E-04        |            | 2.0E-05                                                                                           | 1.3E-05         | 8.3E-05                                        | 2.9E-06                                          |              |
| 24 | 2,5OH-LMNALD | 8.0E+05                           | 0.95          | 1.6E-04                                                                                       | 1.6E-04        |            | 2.0E-05                                                                                           | 1.3E-05         | 7.3E-05                                        | 2.6E-06                                          |              |
| 25 | 4,7OH-LMNALD | 8.0E+05                           | 0.95          | 1.6E-04                                                                                       | 1.6E-04        |            | 2.0E-05                                                                                           | 1.3E-05         | 4.4E-05                                        | 1.6E-06                                          |              |
| 26 | HPALD1       | 1.2E+05                           | 0.75          | 5.1E-05                                                                                       | 8.9E-07        | 6.3E-05    | 1.8E-05                                                                                           | 7.6E-06         | - <sup>k</sup>                                 | - <sup>k</sup>                                   |              |

46 <sup>a</sup> Henry's law constants calculated using EPISuite version 4.1 (US EPA. Estimation Programs Interface Suite™ for Microsoft® Windows v 4.1,  
47 2016).

48 <sup>b</sup> Fraction of OVOC in the aqueous phase, calculated as  $\chi_{aq} = 1/(1+1/(K_H \times L \times R \times T))$ , where  $K_H$  is the Henry's law constant of the OVOC,  $L$  is the  
49 assumed liquid water content ( $1 \times 10^{-6}$  L-aq/L-g),  $R$  is the universal gas constant ( $0.082$  L atm K<sup>-1</sup> mol<sup>-1</sup>), and  $T = 298$  K.

50 <sup>c,d,f,g,h,i</sup> Pseudo-first-order rate constant for loss of OVOC due to oxidation by the given oxidant in the gas or aqueous phase, calculated by  
51 multiplying the bimolecular reaction rate constant (Table S6) with the corresponding steady-state concentration of the oxidant: [<sup>•</sup>OH(g)] =  $1 \times 10^6$   
52 molecules cm<sup>-3</sup>, [O<sub>3</sub>(g)] = 30 ppbv =  $7.4 \times 10^{11}$  molecules cm<sup>-3</sup>, [<sup>•</sup>OH(aq)] =  $2 \times 10^{-15}$  M (estimate in typical fog drops, includes gas-to-aqueous  
53 partitioning, Kaur and Anastasio (2017)).

54 [O<sub>3</sub>(aq)] =  $3.3 \times 10^{-10}$  M (based on 30 ppbv O<sub>3</sub>(g) and  $K_H = 1.1 \times 10^{-2}$  M atm<sup>-1</sup>; Seinfeld and Pandis (2012), and [<sup>3</sup>C\*(aq)] =  $5 \times 10^{-14}$  M (average  
55 concentration measured in Davis fog, Kaur and Anastasio (2017)).

56 <sup>h</sup> Pseudo-first-order rate constant for loss of OVOC due to oxidation by highly reactive triplets such as <sup>3</sup>BP\*. This was calculated using the  
57 predicted second-order rate constants  $k_{OVOC+3BP^*}$  (Table 1, main text) and [<sup>3</sup>C\*(aq)] given in the footnote above.

58 <sup>i</sup> Pseudo-first-order rate constant for loss of OVOC due to oxidation by triplets of typical reactivity as measured in fog and particles in Davis, CA  
59 (Kaur and Anastasio, 2017; Kaur and Anastasio, 2018). To estimate these rate constants we multiplied the predicted second-order rate constants  
60 with <sup>3</sup>BP\* ( $k_{OVOC+3BP^*}$ ) by a factor of 0.04, which is the ratio of the average of the rate constants of reaction of MeJA with <sup>3</sup>MAP\* and <sup>3</sup>DMB\*  
61 ( $2.7 \times 10^8$  M<sup>-1</sup> s<sup>-1</sup>, Table S8) divided by the rate constant for MeJA with <sup>3</sup>BP\* ( $7.5 \times 10^9$  M<sup>-1</sup> s<sup>-1</sup>, Tables S1 and S8).

62 <sup>e,j</sup> First-order rate constants for gas-phase photolysis and aqueous hydrolysis of the OVOC, respectively (also given in Table S5).

63 <sup>k</sup> The value of  $k_{ALK+3BP^*}$  for HPALD1 could not be determined due to challenges with calculating its oxidation potential. Because the CB3-QB3  
64 method scales at  $N^7$  (where  $N$  is the number of atoms), the larger compound required more computational power than available.

65 **Table S7.** OVOC lifetimes and fractions lost due to various pathways.

| High Triplet Reactivity Scenario    |              | Total                                                 |                            | Fraction of OVOC lost due to each pathway <sup>c</sup> |                    |       |         |                     |                      |         |
|-------------------------------------|--------------|-------------------------------------------------------|----------------------------|--------------------------------------------------------|--------------------|-------|---------|---------------------|----------------------|---------|
| #                                   | OVOC Name    | $k'_{\text{OVOC}}$ <sup>a</sup><br>(s <sup>-1</sup> ) | $\tau$ <sup>b</sup><br>(h) | •OH(g)                                                 | O <sub>3</sub> (g) | hv(g) | •OH(aq) | O <sub>3</sub> (aq) | <sup>3</sup> BP*(aq) | Hyd(aq) |
| 18                                  | β4-ISOPOOH   | 2.7E-05                                               | 10                         | 13%                                                    | 1.0%               | 0%    | 18%     | 54%                 | 14%                  | 0%      |
| 19                                  | δ4-ISOPOOH   | 9.0E-05                                               | 3.1                        | 3.9%                                                   | 0.32%              | 0%    | 5.4%    | 17%                 | 74%                  | 0%      |
| 20                                  | β-ISONO2     | 5.9E-05                                               | 4.7                        | 41%                                                    | 0.28%              | 0%    | 9.4%    | 15%                 | 19%                  | 15%     |
| 21                                  | δ-ISONO2     | 3.6E-03                                               | 0.078                      | 1.5%                                                   | 0.29%              | 0%    | 0.14%   | 0.22%               | 0.66%                | 97%     |
| 22                                  | HPALD2       | 6.3E-05                                               | 4.4                        | 20%                                                    | 0.35%              | 25%   | 21%     | 9.1%                | 24%                  | 0%      |
| 23                                  | LMNALD       | 3.0E-04                                               | 0.93                       | 49%                                                    | 47%                | 0%    | 0.67%   | 0.44%               | 2.8%                 | 0%      |
| 24                                  | 2,5OH-LMNALD | 1.2E-04                                               | 2.4                        | 6.9%                                                   | 6.7%               | 0%    | 16%     | 11%                 | 59%                  | 0%      |
| 25                                  | 4,7OH-LMNALD | 8.9E-05                                               | 3.1                        | 9.0%                                                   | 8.8%               | 0%    | 21%     | 14%                 | 47%                  | 0%      |
| 26                                  | HPALD1       | 4.8E-05                                               | 5.8                        | 27%                                                    | 0.46%              | 33%   | 28%     | 12%                 | - <sup>d</sup>       | 0%      |
| Typical Triplet Reactivity Scenario |              | Total                                                 |                            | Fraction of OVOC lost due to each pathway <sup>c</sup> |                    |       |         |                     |                      |         |
| #                                   | OVOC Name    | $k'_{\text{OVOC}}$ <sup>a</sup><br>(s <sup>-1</sup> ) | $\tau$ <sup>b</sup><br>(h) | •OH(g)                                                 | O <sub>3</sub> (g) | hv(g) | •OH(aq) | O <sub>3</sub> (aq) | <sup>3</sup> C*(aq)  | Hyd(aq) |
| 18                                  | β4-ISOPOOH   | 2.4E-05                                               | 12                         | 15%                                                    | 1.2%               | 0%    | 20%     | 63%                 | 0.58%                | 0%      |
| 19                                  | δ4-ISOPOOH   | 2.6E-05                                               | 11                         | 14%                                                    | 1.1%               | 0%    | 19%     | 58%                 | 9.0%                 | 0%      |
| 20                                  | β-ISONO2     | 4.8E-05                                               | 5.8                        | 51%                                                    | 0.43%              | 0%    | 12%     | 18%                 | 0.84%                | 18%     |
| 21                                  | δ-ISONO2     | 3.5E-03                                               | 0.079                      | 1.5%                                                   | 0.29%              | 0%    | 0.14%   | 0.22%               | 0.02%                | 98%     |
| 22                                  | HPALD2       | 4.8E-05                                               | 5.7                        | 26%                                                    | 0.46%              | 33%   | 28%     | 12%                 | 1.1%                 | 0%      |
| 23                                  | LMNALD       | 2.9E-04                                               | 1.0                        | 50%                                                    | 49%                | 0%    | 0.69%   | 0.45%               | 0.10%                | 0%      |
| 24                                  | 2,5OH-LMNALD | 5.0E-05                                               | 5.6                        | 16%                                                    | 16%                | 0%    | 38%     | 25%                 | 4.9%                 | 0%      |
| 25                                  | 4,7OH-LMNALD | 4.9E-05                                               | 5.7                        | 16%                                                    | 16%                | 0%    | 39%     | 26%                 | 3.0%                 | 0%      |
| 26                                  | HPALD1       | 4.8E-05                                               | 5.8                        | 27%                                                    | 0.46%              | 33%   | 28%     | 12%                 | - <sup>d</sup>       | 0%      |

66 <sup>a</sup> Total pseudo-first order rate constant for loss of OVOC, calculated as  $k'_{\text{OVOC}} = \Sigma(\chi_{\text{aq}} \times k'_{\text{Ox, aq}} + (1 - \chi_{\text{aq}}) \times k'_{\text{Ox, gas}})$ . All pseudo-first-order rate  
67 constants ( $k'_{\text{Ox, aq}}$ ,  $k'_{\text{Ox, gas}}$ ,  $j_{\text{hv}}$ ,  $k'_{\text{Hyd}}$ ) are given in Table S6.

68 <sup>b</sup> Total lifetime of OVOC, calculated as  $1/k'_{\text{OVOC}}$ .

69 <sup>c</sup> Fraction of OVOC lost due to each pathway, calculated as  $(\chi_{\text{aq}} \times k'_{\text{Ox, aq}})/k'_{\text{OVOC}}$  for aqueous pathways and  $((1 - \chi_{\text{aq}}) \times k'_{\text{Ox, gas}})/k'_{\text{OVOC}}$  for gas-phase  
70 processes.

71 <sup>d</sup> We were unable to compute the oxidation potential for HAPLD1 (see footnote *k* in Table S6), and thus could not estimate its rate constant with  
72 triplets.



73 **Table S8.** Second-order rate constants for reaction of some alkenes with model triplet excited states.

| ALK        | $k_{\text{ALK}+3\text{C}^*}$<br>$10^8 \text{ M}^{-1} \text{ s}^{-1}$ |                                 |                            | Average ( $k_{\text{MeJA}+3\text{MAP}^*}, k_{\text{MeJA}+3\text{DMB}^*}) /$<br>$k_{\text{MeJA}+3\text{BP}^*}$ <sup>c</sup> ) |
|------------|----------------------------------------------------------------------|---------------------------------|----------------------------|------------------------------------------------------------------------------------------------------------------------------|
|            | <sup>3</sup> MAP*                                                    | <sup>3</sup> DMB*               | <sup>3</sup> BP*           |                                                                                                                              |
| cHxO (15)  | 1.1 ( $\pm$ 0.2) <sup>a</sup>                                        | 0.24 ( $\pm$ 0.10) <sup>a</sup> | 64 ( $\pm$ 6) <sup>b</sup> | 0.010                                                                                                                        |
| cHxAc (16) | 7.9 ( $\pm$ 2.0) <sup>a</sup>                                        | 15 ( $\pm$ 4) <sup>a</sup>      | 65 ( $\pm$ 6) <sup>b</sup> | 0.18                                                                                                                         |
| MeJA (17)  | 1.2 ( $\pm$ 0.3) <sup>a</sup>                                        | 4.1 ( $\pm$ 1.6) <sup>a</sup>   | 75 ( $\pm$ 5) <sup>b</sup> | 0.035 <sup>d</sup>                                                                                                           |

74 <sup>a</sup> Rate constants from Richards-Henderson et al. (2014). Listed uncertainties are  $\pm$  1 standard errors.75 <sup>b</sup> Rate constants measured in this work (also shown in Table S1). Listed uncertainties here are  $\pm$  1 standard  
76 deviation,  $n = 3$ .77 <sup>c</sup> The ratio of the average bimolecular rate constants for reaction of MeJA with model triplets <sup>3</sup>MAP\* and  
78 <sup>3</sup>DMB\* to the rate constant for MeJA with <sup>3</sup>BP\*.79 <sup>d</sup> This is the rate constant ratio for MeJA as well as the median value of the rate constant ratio (see footnote a)  
80 for the three alkenes.

81

82

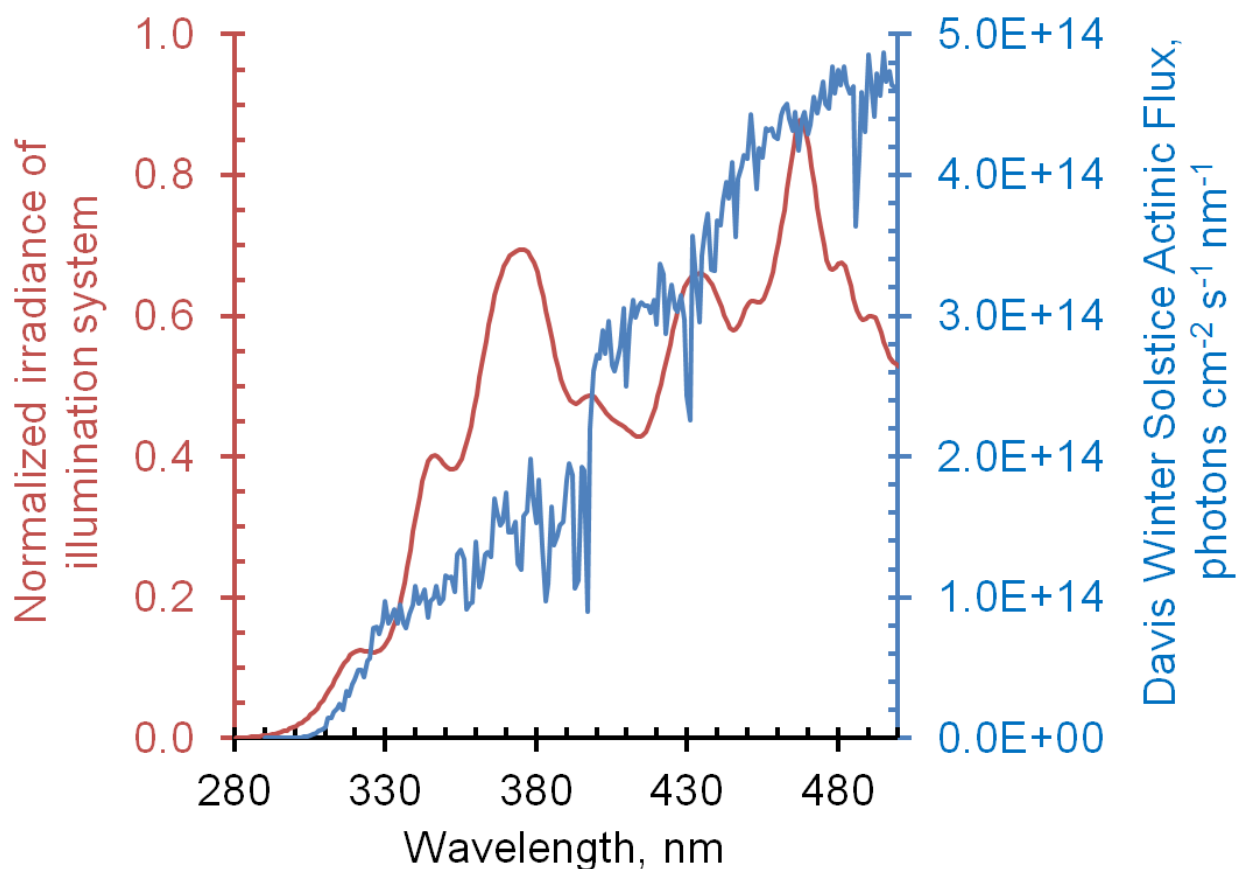

83

84 **Figure S1.** Comparison of the normalized irradiance from our illumination system (red line) and  
85 Davis, midday, winter solstice sunlight from the TUV model (blue line; Madronich et al. (2002)).  
86 Our illumination system irradiance was measured using a TIDAS spectrophotometer (absolute  
87 units: counts cm<sup>-2</sup> nm<sup>-1</sup> s<sup>-1</sup>) and normalized so that the area under its curve is equal to the area  
88 under the TUV actinic flux curve. Input parameters for the TUV model were: solar zenith angle:  
89 62°, measurement altitude: 0 km, surface albedo: 0.1, aerosol optical depth: 0.235, cloud optical  
90 depth: 0.00.

91

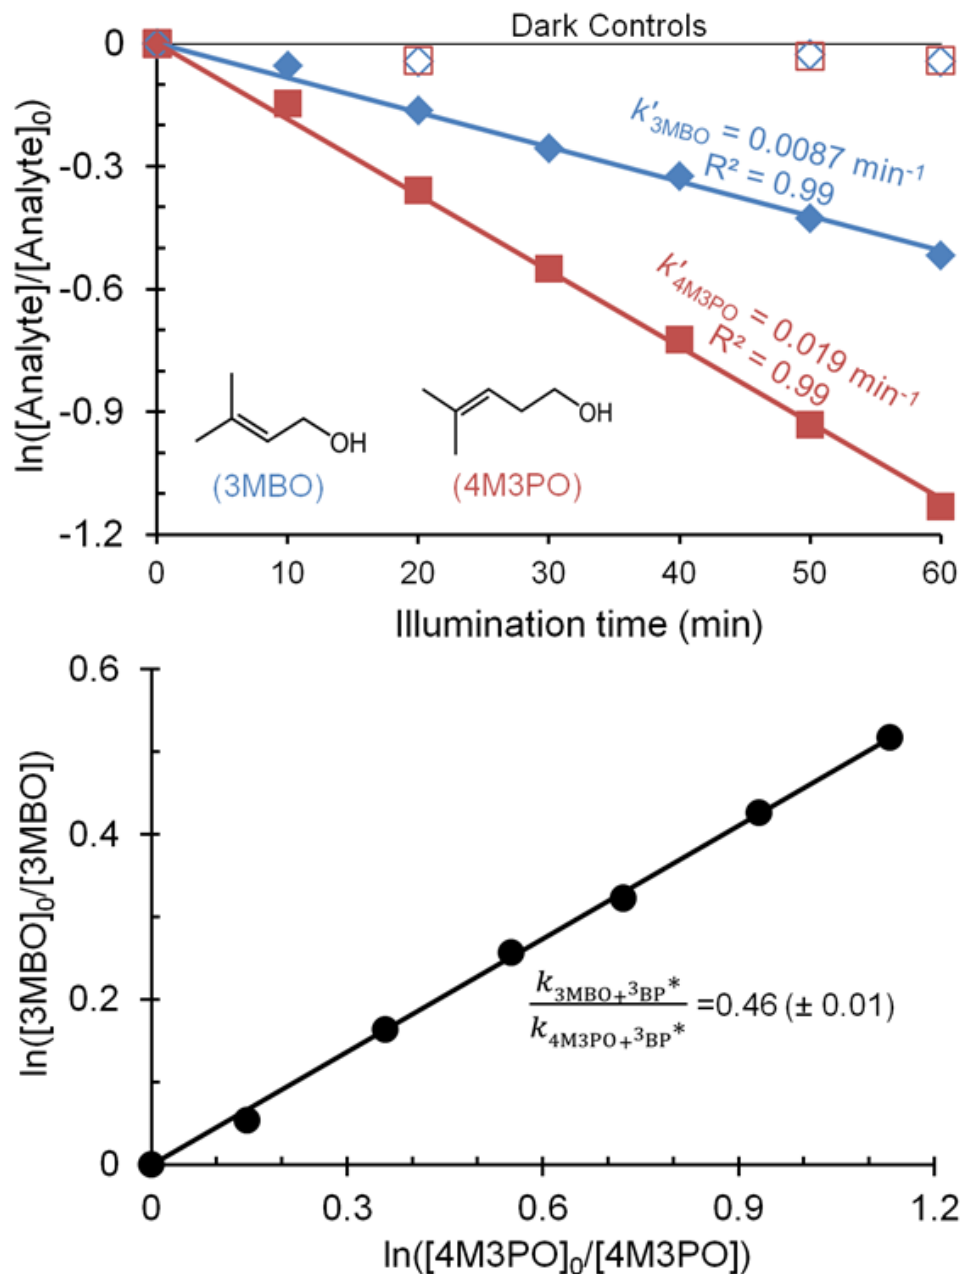

92

93 **Figure S2.** Illustration of the relative rate technique used for measuring rate constants  
 94 (Finlayson-Pitts and Pitts Jr, 1999; Richards-Henderson et al., 2014). Top panel: Aqueous loss of  
 95 the alkene (4M3PO) and reference compound (3MBO) in the presence of the BP triplet under  
 96 solar simulated light (298 K, pH 5.5 ( $\pm 0.2$ )). Bottom panel: Plot of change in concentration of  
 97 reference compound against alkene. The slope represents the ratio ( $\pm 1$  SE) of the bimolecular  
 98 rate constants with the BP triplet.

99

100

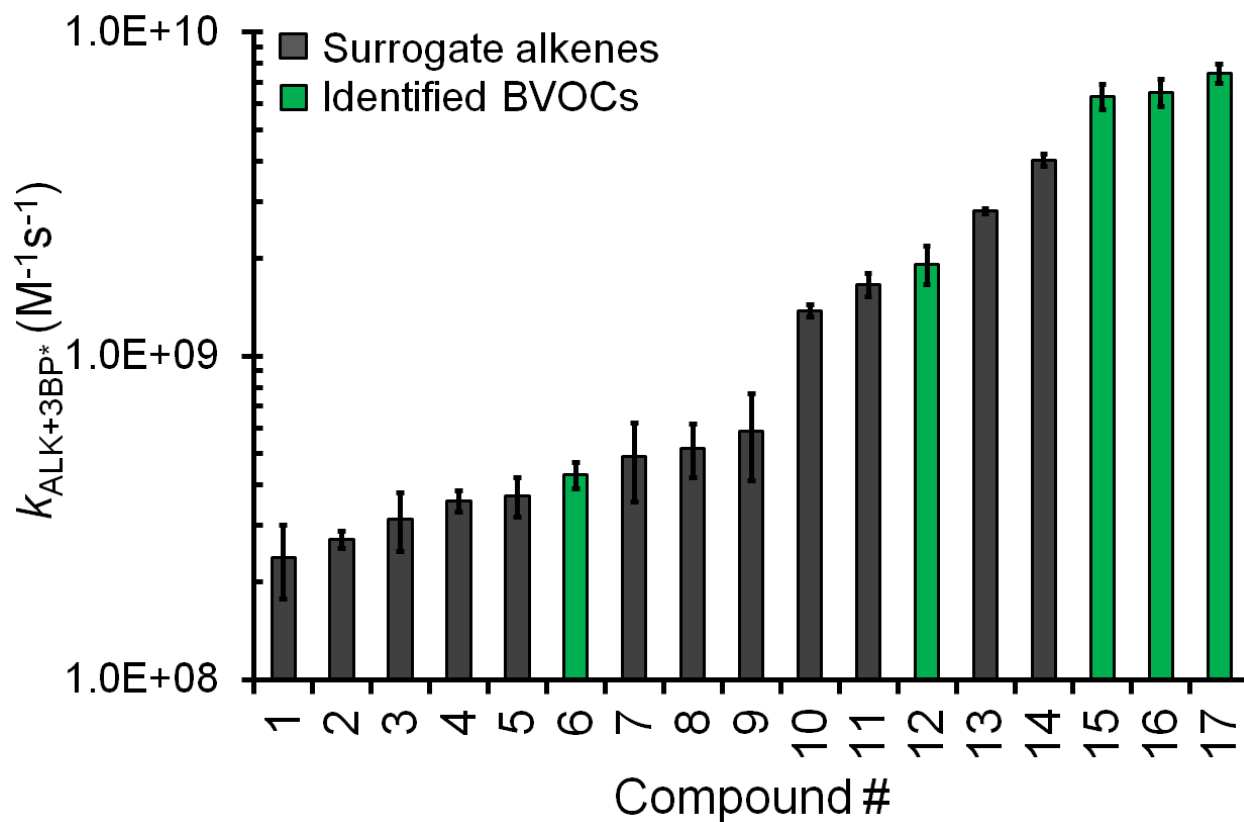

101

102 **Figure S3.** Measured bimolecular rate constants of 17 alkenes with triplet benzophenone. Green  
 103 bars represent biogenic volatile organic compounds known to be emitted from plants; grey bars  
 104 represent other  $\text{C}_3$ – $\text{C}_6$  alkenes. Error bars represent  $\pm 1$  standard deviation ( $n = 3$ ) except for  
 105 compound 11, where  $n = 1$  and the error is  $\pm 1$  SE (see Table S1 for details). Experimental  
 106 conditions: 298 K,  $\text{pH } 5.5 \pm 0.2$ , 1.0 mM phosphate buffer).

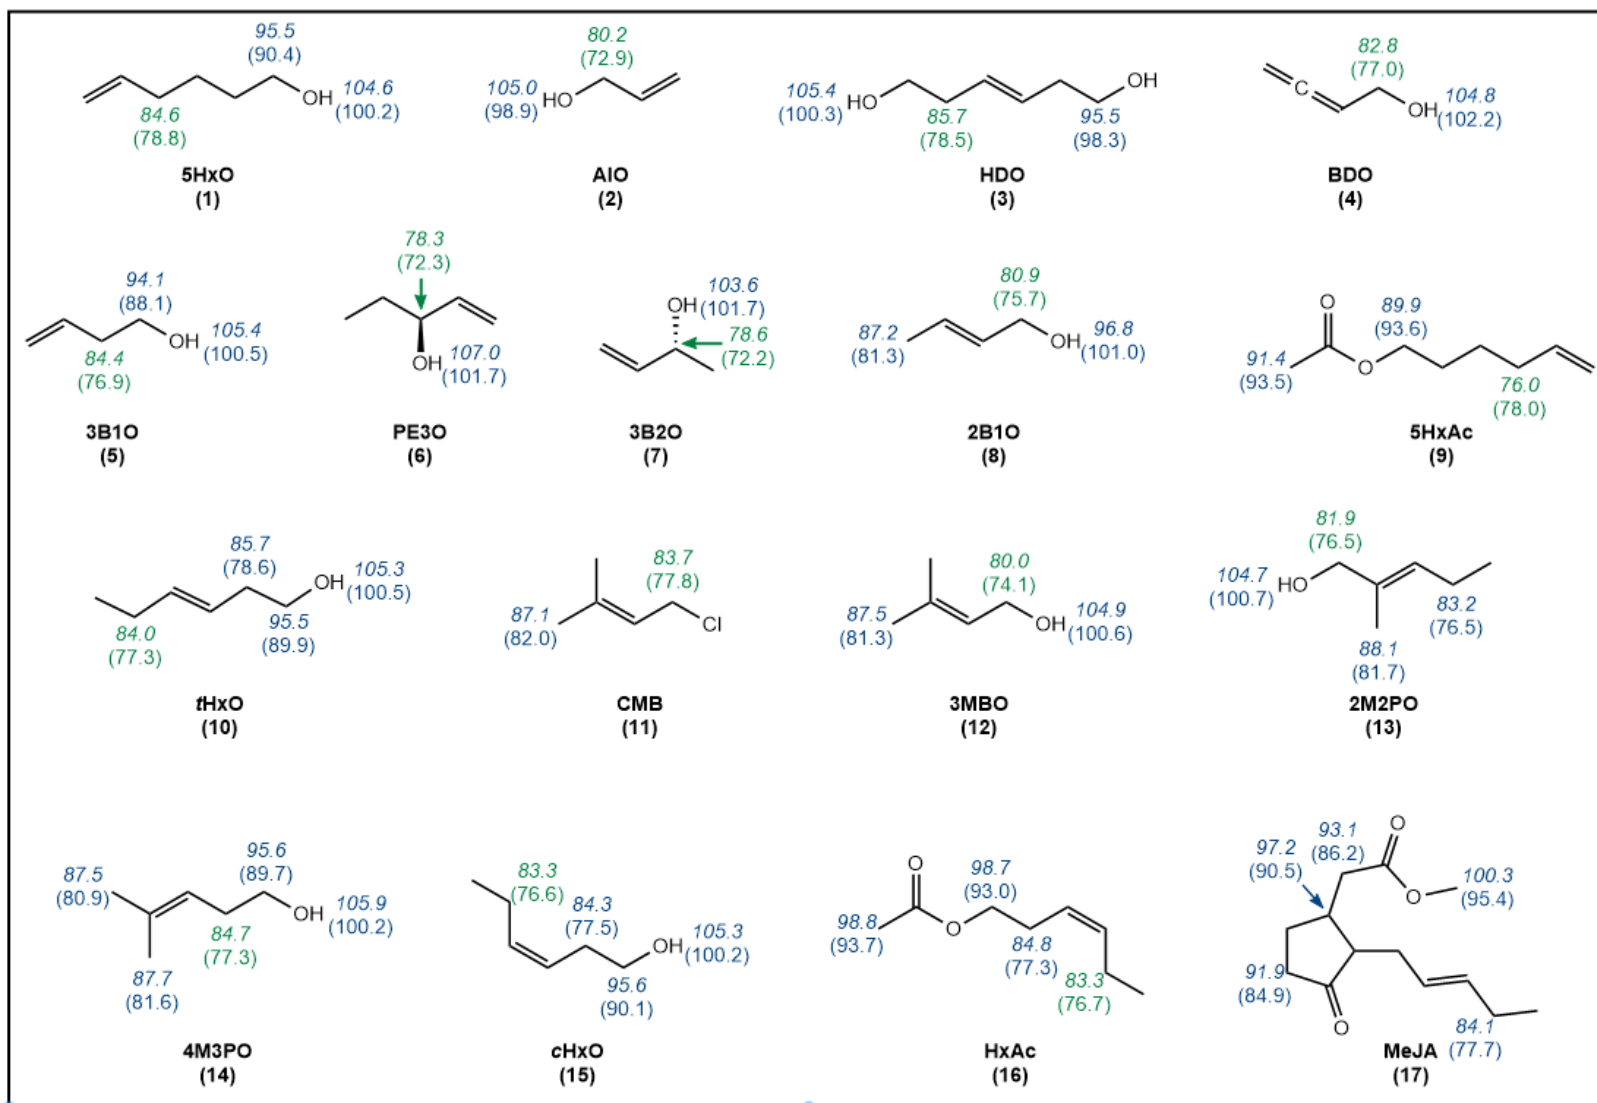

107

108 **Figure S4.** Bond dissociation enthalpies (in italics) and bond dissociation free energies (in parentheses) in kcal mol<sup>-1</sup> for various  
 109 hydrogens in each alkene. For each compound the hydrogen most likely to be abstracted, i.e., with the lowest bond dissociation  
 110 energy, is shown in green.

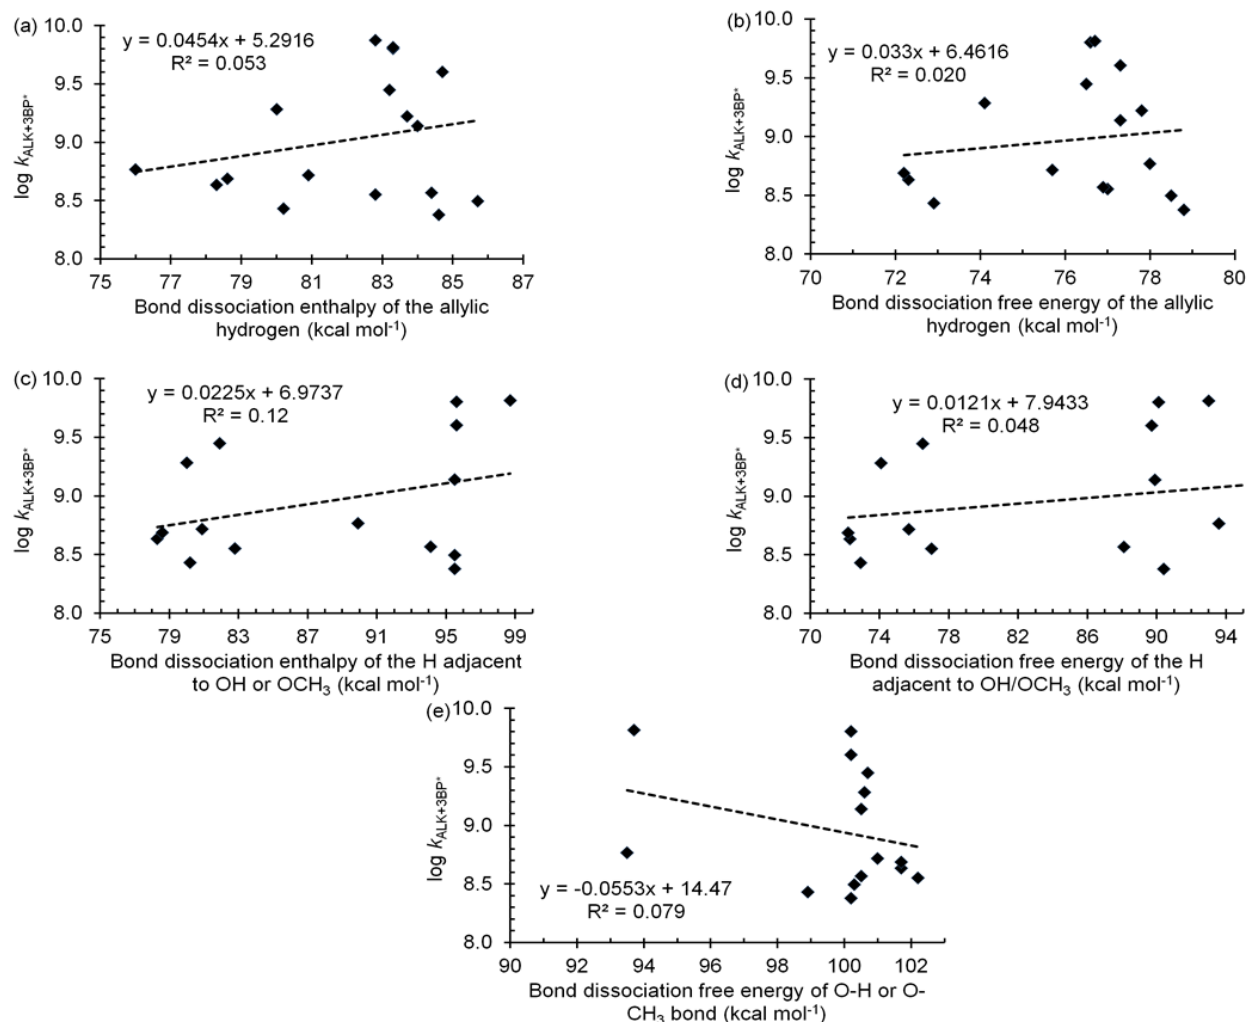

111

112 **Figure S5.** Correlation plots for measured rate constants and various computed bond dissociation  
 113 energies. (a) Log  $k_{\text{ALK}+3\text{BP}^*}$  versus the lowest bond dissociation enthalpy of the allylic hydrogen  
 114 in each alkene (i.e., the green values in Fig. S4). (b) Log  $k_{\text{ALK}+3\text{BP}^*}$  versus the lowest bond  
 115 dissociation free energy of the allylic hydrogen. (c) Log  $k_{\text{ALK}+3\text{BP}^*}$  versus the bond dissociation  
 116 enthalpy of the hydrogen attached to the carbon adjacent to the  $-\text{OH}$  or  $-\text{OCH}_3$  group. (d) Log  
 117  $k_{\text{ALK}+3\text{BP}^*}$  versus the bond dissociation free energy of the hydrogen attached to the carbon  
 118 adjacent to the  $-\text{OH}$  or  $-\text{OCH}_3$  group. (e):  $\log k_{\text{ALK}+3\text{BP}^*}$  versus bond dissociation free energy of  
 119 the O-H or  $\text{OH}_2\text{C-H}$  bond. Bond dissociation energies are shown in Fig. S4.

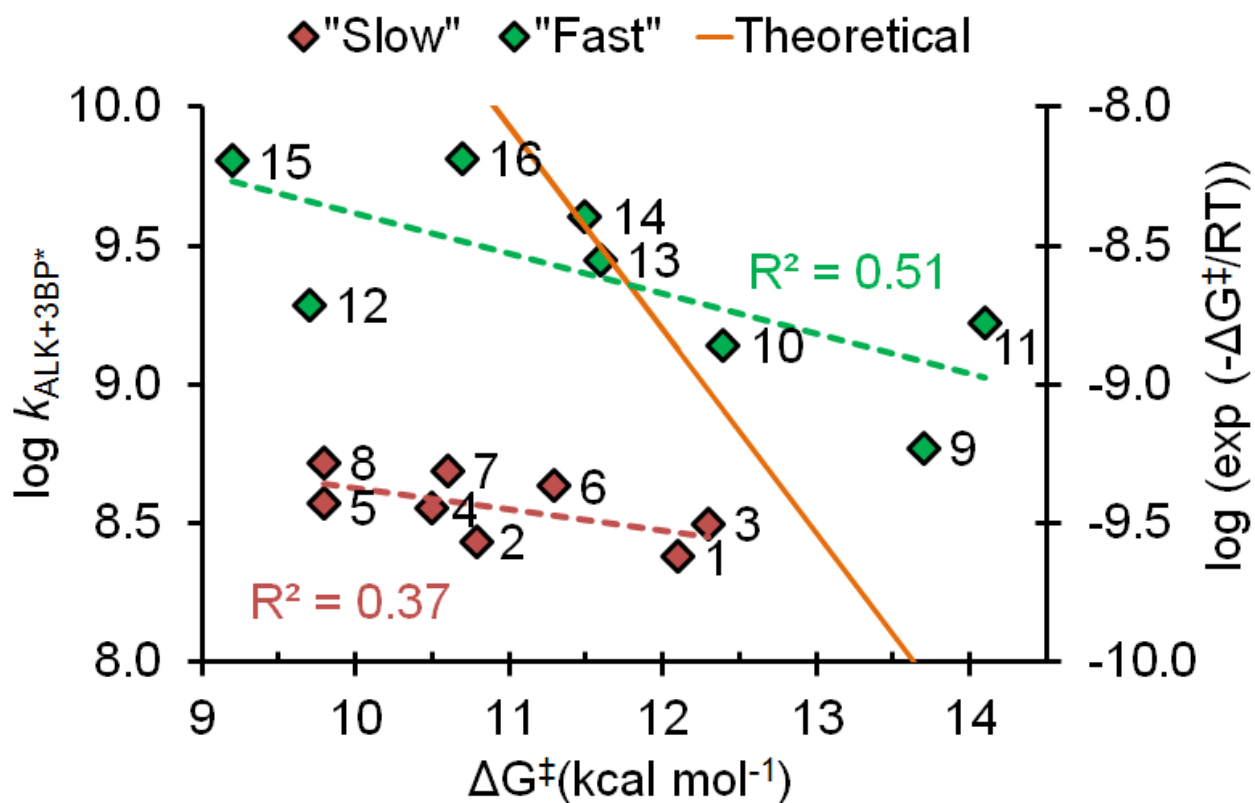

121

122 **Figure S6.** Log  $k_{\text{ALK}+3\text{BP}^*}$  versus lowest transition state free energy barrier. The alkenes are  
 123 broken down into two groups:  $k_{\text{ALK}+3\text{BP}^*} < 5 \times 10^8 \text{ M}^{-1} \text{ s}^{-1}$  (slow, red) and  $k_{\text{ALK}+3\text{BP}^*} \geq 5 \times 10^8 \text{ M}^{-1} \text{ s}^{-1}$  (fast, green).  
 124 The slopes ( $\pm 1$  SE) of these lines are  $-0.077 (\pm 0.041)$  and  $-0.15 (\pm 0.06)$   
 125  $\text{mol kcal}^{-1}$ , respectively. Transition state energy barrier values are given in Table 1 of the main  
 126 text. The orange line (plotted on the secondary y-axis) shows the trend in  $k$  values expected from  
 127 transition state theory ( $k_{\text{ALK}+3\text{BP}^*} = A \times \exp (-\Delta G^\ddagger / RT)$ ).

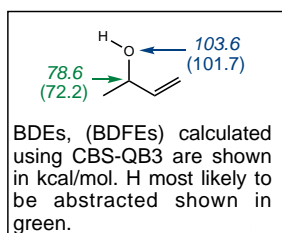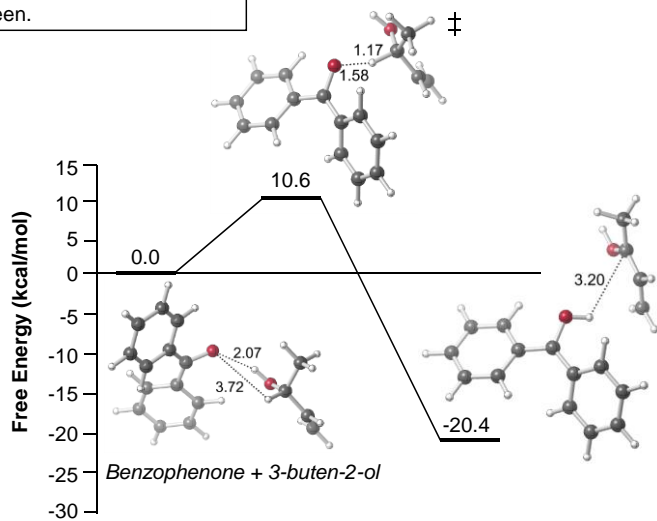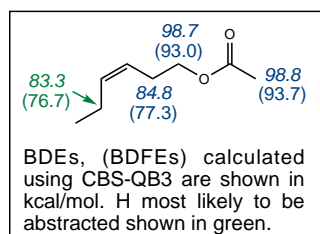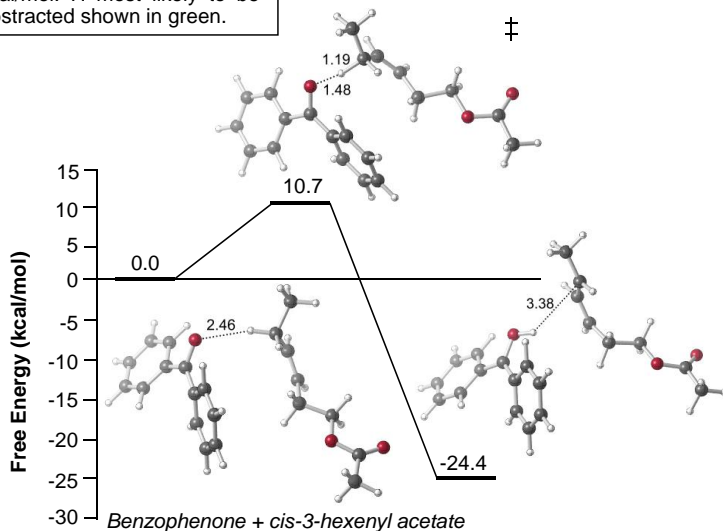

128

129 **Figure S7.** Lowest transition state energy barriers for two alkenes: **7**, 3B2O, in the top panel and  
 130 **16**, cHxAc, in the bottom panel. Both show the hydrogen most likely to be abstracted during  
 131 oxidation; in both cases this is an allylic H.



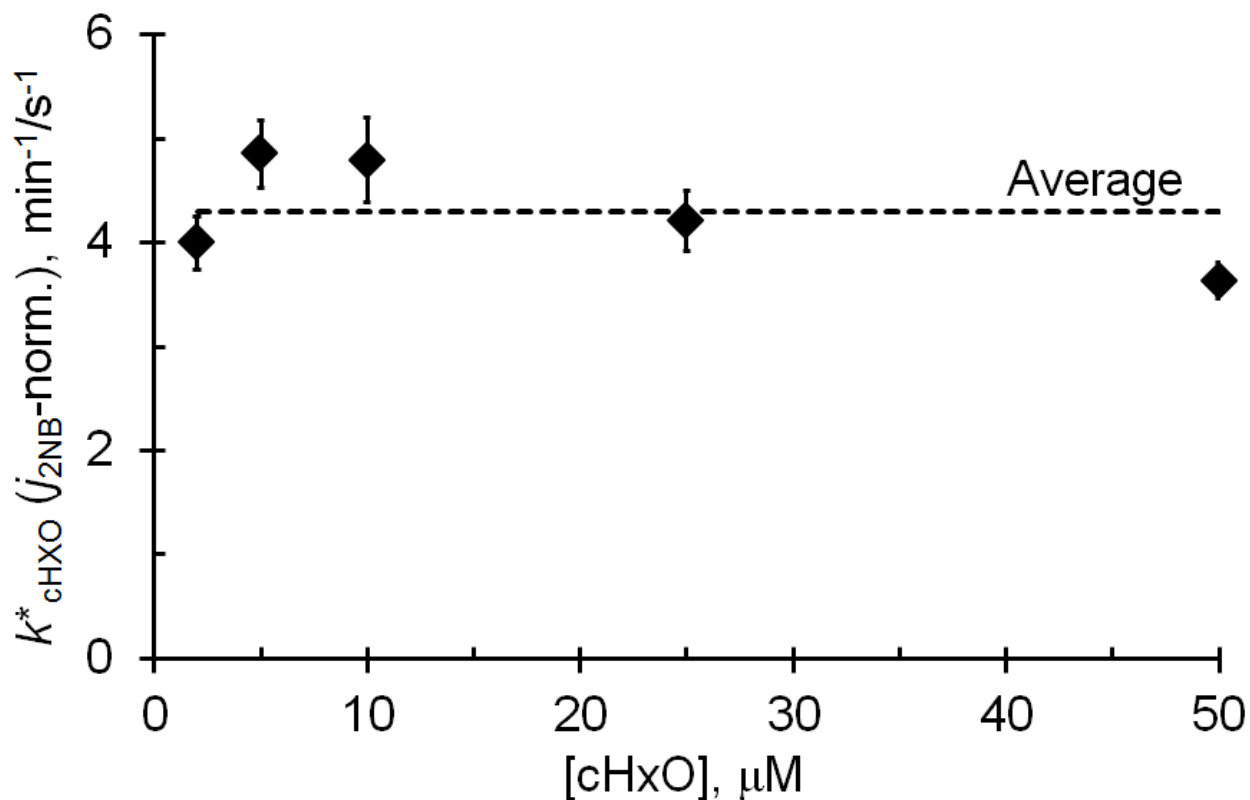

133

134 **Figure S8.** Pseudo-first-order loss rate constant of cHxO ( $k^*_{\text{cHxO}}$ ) as a function of the  
 135 concentration of cHxO. Since these experiments were performed on different days, the values are  
 136 normalized to the photon flux of the illumination system on the day of the experiment by  
 137 dividing by  $j_{2\text{NB}}$  (details in Kaur and Anastasio (2017)). The average ( $\pm 1 \sigma$ ) value is  $4.3 \pm 0.5$   
 138  $\text{min}^{-1}/\text{s}^{-1}$ , giving a relative standard deviation of 12 %.

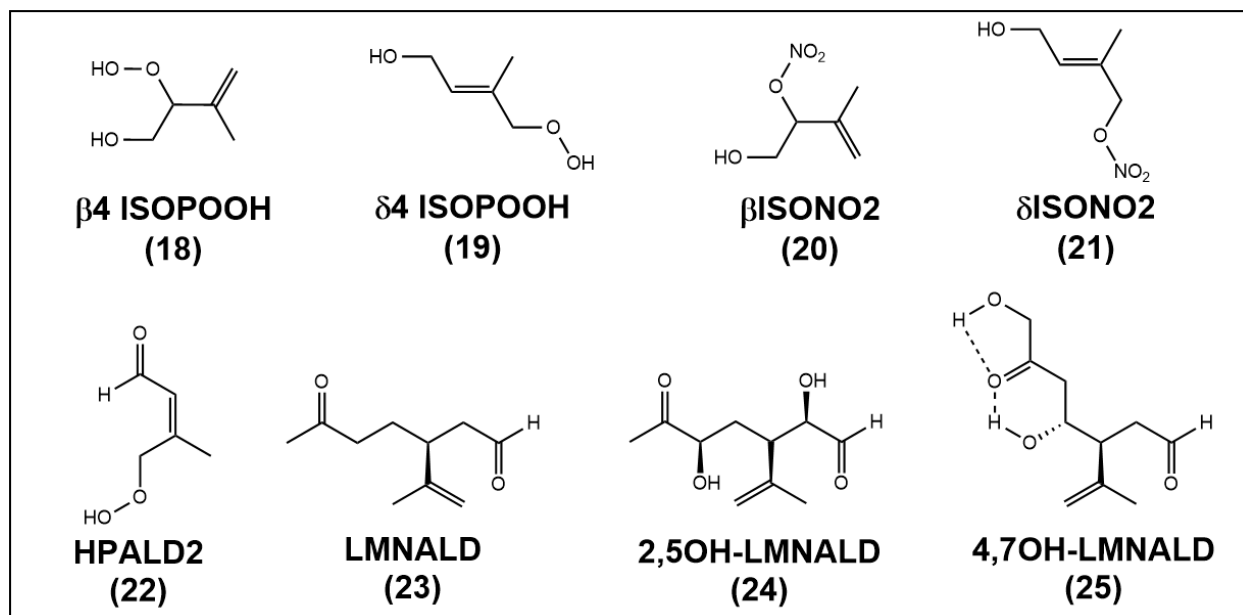

139

140 **Figure S9.** Lowest energy isomers of isoprene- and limonene-derived OVOCs, determined with  
 141 gas-phase calculations using the CBS-QB3 compound method.

142 **References**

- 143 Canonica, S., Hellrung, B., and Wirz, J.: Oxidation of phenols by triplet aromatic ketones in aqueous  
144 solution, *J. Phys. Chem. A*, 104, 1226-1232, 2000.
- 145 Finlayson-Pitts, B. J., and Pitts Jr, J. N.: *Chemistry of the Upper and Lower Atmosphere: Theory,*  
146 *Experiments, and Applications*, Academic press, 1999.
- 147 Frisch, M., Trucks, G., Schlegel, H., Scuseria, G., Robb, M., Cheeseman, J., Scalmani, G., Barone, V.,  
148 Petersson, G., Nakatsuji, H., Li, X., Caricato, M., Marenich, A., Bloino, J., Janesko, B., Gomperts,  
149 R., Mennucci, B., Hratchian, H., Ortiz, J., Izmaylov, A., Sonnenberg, J., Williams-Young, D., Ding,  
150 F., Lipparini, F., Egidi, F., Goings, J., Peng, B., Petrone, A., Henderson, T., Ranasinghe, D.,  
151 Zakrzewski, V. G., Gao, J., Rega, N., Zheng, G., Liang, W., Hada, M., Ehara, M., Toyota, K., Fukuda,  
152 R., Hasegawa, J., Ishida, M., Nakajima, T., Honda, Y., Kitao, O., Nakai, H., Vreven, T., Throssell, K.,  
153 J. A. Montgomery, J., Peralta, J. E., Ogliaro, F., Bearpark, M., Heyd, J. J., Brothers, E., Kudin, K. N.,  
154 Staroverov, V. N., Keith, T., Kobayashi, R., Normand, J., Raghavachari, K., Rendell, A., Burant, J.  
155 C., Iyengar, S. S., Tomasi, J., Cossi, M., Millam, J. M., Klene, M., Adamo, C., Cammi, R., Ochterski,  
156 J. W., Martin, R. L., Morokuma, K., Farkas, O., JB, F., and DJ, F.: *Gaussian 09*, Revision D.01;  
157 *Gaussian*: Wallingford, CT, USA, 2016,
- 158 Gill, K. J., and Hites, R. A.: Rate constants for the gas-phase reactions of the hydroxyl radical with  
159 isoprene,  $\alpha$ - and  $\beta$ -pinene, and limonene as a function of temperature, *The Journal of Physical*  
160 *Chemistry A*, 106, 2538-2544, 2002.
- 161 Herrmann, H., Schaefer, T., Tilgner, A., Styler, S. A., Weller, C., Teich, M., and Otto, T.: Tropospheric  
162 aqueous-phase chemistry: Kinetics, mechanisms, and its coupling to a changing gas phase,  
163 *Chem. Rev.*, 115, 4259-4334, 2015.
- 164 Jacobs, M. I., Burke, W., and Elrod, M. J.: Kinetics of the reactions of isoprene-derived hydroxynitrates:  
165 gas phase epoxide formation and solution phase hydrolysis, *Atmos. Chem. Phys.*, 14, 8933-8946,  
166 2014.
- 167 Kaur, R., and Anastasio, C.: Light absorption and the photoformation of hydroxyl radical and singlet  
168 oxygen in fog waters, *Atmos. Environ.*, 164, 387-397, 2017.
- 169 Kaur, R., and Anastasio, C.: First Measurements of Organic Triplet Excited States in Atmospheric Waters,  
170 *Environ. Sci. Technol.*, 52, 5218-5226, 2018.
- 171 Khamaganov, V. G., and Hites, R. A.: Rate Constants for the Gas-Phase Reactions of Ozone with Isoprene,  
172  $\alpha$ - and  $\beta$ -Pinene, and Limonene as a Function of Temperature, *The Journal of Physical Chemistry*  
173 *A*, 105, 815-822, 2001.
- 174 Lee, L., Teng, A. P., Wennberg, P. O., Crouse, J. D., and Cohen, R. C.: On Rates and Mechanisms of OH  
175 and O<sub>3</sub> Reactions with Isoprene-Derived Hydroxy Nitrates, *The Journal of Physical Chemistry A*,  
176 118, 1622-1637, 2014.
- 177 Madronich, S., Flocke, S., Zeng, J., Petropavlovskikh, I., and Lee-Taylor, J.: *Tropospheric Ultraviolet-*  
178 *Visible Model (TUV) version 4.1*, National Center for Atmospheric Research, PO Box, 3000, 2002.
- 179 Richards-Henderson, N. K., Pham, A. T., Kirk, B. B., and Anastasio, C.: Secondary organic aerosol from  
180 aqueous reactions of green leaf volatiles with organic triplet excited states and singlet molecular  
181 oxygen, *Environ. Sci. Technol.*, 49, 268-276, 2014.
- 182 Rivera-Rios, J. C., Zhao, R., Lee, A. K. Y., Abbatt, J. P. D., Crouse, J. D., Compornolle, S., Wennberg, P. O.,  
183 and Keutsch, F. N.: In Preparation, 2018.
- 184 Schöne, L., and Herrmann, H.: Kinetic measurements of the reactivity of hydrogen peroxide and ozone  
185 towards small atmospherically relevant aldehydes, ketones and organic acids in aqueous  
186 solutions, *Atmos. Chem. Phys.*, 14, 4503, 2014.
- 187 Schöne, L., Schindelka, J., Szeremeta, E., Schaefer, T., Hoffmann, D., Rudzinski, K. J., Szmigielski, R., and  
188 Herrmann, H.: Atmospheric aqueous phase radical chemistry of the isoprene oxidation products

189 methacrolein, methyl vinyl ketone, methacrylic acid and acrylic acid—kinetics and product  
190 studies, *Phys. Chem. Chem. Phys.*, 16, 6257-6272, 2014.

191 Seinfeld, J. H., and Pandis, S. N.: Atmospheric chemistry and physics: From air pollution to climate  
192 change, John Wiley & Sons, 2012.

193 St. Clair, J. M., Rivera-Rios, J. C., Crouse, J. D., Knap, H. C., Bates, K. H., Teng, A. P., Jørgensen, S.,  
194 Kjaergaard, H. G., Keutsch, F. N., and Wennberg, P. O.: Kinetics and Products of the Reaction of  
195 the First-Generation Isoprene Hydroxy Hydroperoxide (ISOPOOH) with OH, *The Journal of*  
196 *Physical Chemistry A*, 120, 1441-1451, 2015.

197 US EPA. Estimation Programs Interface Suite™ for Microsoft® Windows v 4.1: Estimation Programs  
198 Interface Suite™ for Microsoft® Windows, v 4.1. United States Environmental Protection Agency,  
199 Washington, DC, USA., 2016.

200 Witkowski, B., Al-sharafi, M., and Gierczak, T.: Kinetics of Limonene Secondary Organic Aerosol  
201 Oxidation in the Aqueous Phase, *Environmental science & technology*, 52, 11583-11590, 2018.

202 Wolfe, G. M., Crouse, J. D., Parrish, J. D., Clair, J. M. S., Beaver, M. R., Paulot, F., Yoon, T. P., Wennberg,  
203 P. O., and Keutsch, F. N.: Photolysis, OH Reactivity and Ozone Reactivity of a Proxy for Isoprene-  
204 Derived Hydroperoxyenals (HPALDs), *Phys. Chem. Chem. Phys.*, 14, 7276-7286, 2012.

205
